# Supplementary material for: Development and Testing of SPIDER-NET: An Interactive Tool for Brain Connectogram Visualization, Sub-Network Exploration and Graph Metrics Quantification
Source: Frontiers journal article supplement (doi:10.3389/fnins.2022.818385), 2022-03-17
Supplement: Data_Sheet_1.ZIP [file Data_Sheet_1.ZIP]

## Sheet: gm_map
PARCELLATION	DESCRIPTION	GROUP-PARCELLATION
BSt	Brain stem	BSt
CS	Central sulcus (Rolando’s fissure)	Fro
FMarG/S	Fronto-marginal gyrus (of Wernicke) and sulcus	Fro
InfFGOpp	Opercular part of the inferior frontal gyrus	Fro
InfFGOrp	Orbital part of the inferior frontal gyrus	Fro
InfFGTrip	Triangular part of the inferior frontal gyrus	Fro
InfFS	Inferior frontal sulcus	Fro
InfPrCS	Inferior part of the precentral sulcus	Fro
LOrS	Lateral orbital sulcus	Fro
MedOrS	Medial orbital sulcus (olfactory sulcus)	Fro
MFG	Middle frontal gyrus	Fro
MFS	Middle frontal sulcus	Fro
OrG	Orbital gyri	Fro
OrS	Orbital sulci (H-shaped sulci)	Fro
PrCG	Precentral gyrus	Fro
RG	Straight gyrus (gyrus rectus)	Fro
SbCG/S	Subcentral gyrus (central operculum) and sulci	Fro
SbOrS	Suborbital sulcus (sulcus rostrales, supraorbital sulcus)	Fro
SupFG	Superior frontal gyrus	Fro
SupFS	Superior frontal sulcus	Fro
SupPrCS	Superior part of the precentral sulcus	Fro
TrFPoG/S	Transverse frontopolar gyri and sulci	Fro
ACirInS	Anterior segment of the circular sulcus of the insula	Ins
ALSHorp	Horizontal ramus of the anterior segment of the lateral sulcus (or fissure)	Ins
ALSVerp	Vertical ramus of the anterior segment of the lateral sulcus (or fissure)	Ins
InfCirInS	Inferior segment of the circular sulcus of the insula	Ins
LoInG/CInS	Long insular gyrus and central insular sulcus	Ins
PosLS	Posterior ramus (or segment) of the lateral sulcus (or fissure)	Ins
ShoInG	Short insular gyri	Ins
SupCirInS	Superior segment of the circular sulcus of the insula	Ins
ACgG/S	Anterior part of the cingulate gyrus and sulcus	Lim
CgSMarp	Marginal branch (or part) of the cingulate sulcus	Lim
MACgG/S	Middle-anterior part of the cingulate gyrus and sulcus	Lim
MPosCgG/S	Middle-posterior part of the cingulate gyrus and sulcus	Lim
PerCaS	Pericallosal sulcus (S of corpus callosum)	Lim
PosDCgG	Posterior-dorsal part of the cingulate gyrus	Lim
PosVCgG	Posterior-ventral part of the cingulate gyrus (isthmus of the cingulate gyrus)	Lim
SbCaG	Subcallosal area, subcallosal gyrus	Lim
ATrCoS	Anterior transverse collateral sulcus	Tem
HG	Heschl’s gyrus (anterior transverse temporal gyrus)	Tem
InfTG	Inferior temporal gyrus	Tem
InfTS	Inferior temporal sulcus	Tem
MTG	Middle temporal gyrus	Tem
PoPl	Polar plane of the superior temporal gyrus	Tem
SupTGLp	Lateral aspect of the superior temporal gyrus	Tem
SupTS	Superior temporal sulcus	Tem
TPl	Temporal plane of the superior temporal gyrus	Tem
TPo	Temporal pole	Tem
TrTS	Transverse temporal sulcus	Tem
AngG	Angular gyrus	Par
IntPS/TrPS	Intraparietal sulcus (interparietal sulcus) and transverse parietal sulci	Par
JS	Sulcus intermedius primus (of Jensen)	Par
PaCL/S	Paracentral lobule and sulcus	Par
POcS	Parieto-occipital sulcus (or fissure)	Par
PosCG	Postcentral gyrus	Par
PosCS	Postcentral sulcus	Par
PrCun	Precuneus	Par
SbPS	Subparietal sulcus	Par
SuMarG	Supramarginal gyrus	Par
SupPL	Superior parietal lobule	Par
AOcS	Anterior occipital sulcus and preoccipital notch (temporo-occipital incisure)	Occ
CcS	Calcarine sulcus	Occ
CoS/LinS	Medial occipito-temporal sulcus (collateral sulcus) and lingual sulcus	Occ
Cun	Cuneus	Occ
FuG	Lateral occipito-temporal gyrus (fusiform gyrus)	Occ
InfOcG/S	Inferior occipital gyrus and sulcus	Occ
LinG	Lingual gyrus, lingual part of the medial occipito-temporal gyrus	Occ
LOcTS	Lateral occipito-temporal sulcus	Occ
MOcG	Middle occipital gyrus, lateral occipital gyrus	Occ
MOcS/LuS	Middle occipital sulcus and lunatus sulcus	Occ
OcPo	Occipital pole	Occ
PaHipG	Parahippocampal gyrus, parahippocampal part of the medial occipito-temporal gyrus	Occ
PosTrCoS	Posterior transverse collateral sulcus	Occ
SupOcG	Superior occipital gyrus	Occ
SupOcS/TrOcS	Superior occipital sulcus and transverse occipital sulcus	Occ
Amg	Amygdala	SbC
CaN	Caudate nucleus	SbC
Hip	Hippocampus	SbC
NAcc	Nucleus accumbens	SbC
Pal	Pallidum	SbC
Pu	Putamen	SbC
Tha	Thalamus	SbC
CeB	Cerebellum	CeB
